# Supplementary material for: The use of cell phones and radio communication systems to reduce delays in getting help for pregnant women in low- and middle-income countries: a scoping review
Source: PubMed Central journal article supplement (PMC4567587; doi:10.3402/gha.v8.28887), 2015-09-10
Supplement: GHA-8-28887-s001.pdf [file GHA-8-28887-s001.pdf]

**Supplemental material to the article ‘The use of cell phones and radio communication systems to reduce delays in getting help for pregnant women in low and middle income countries: A scoping review’**

**Details of the search terms**

1. Cochrane Library

Date Run: 15/06/15

Description:

| ID  | Search Hits                                                            |      |
|-----|------------------------------------------------------------------------|------|
| #1  | MeSH descriptor: [(Pregnant Women)] explode all trees                  | 100  |
| #2  | MeSH descriptor: [(Parturition)] explode all trees                     | 257  |
| #3  | pregnant next wom*:ti,ab,kw (Word variations have been searched)       | 5031 |
| #4  | "childbirth":ti,ab,kw (Word variations have been searched)             | 1322 |
| #5  | MeSH descriptor: [(Cell Phones)] explode all trees                     | 454  |
| #6  | cell, mobile next phone:ti,ab,kw (Word variations have been searched)  | 242  |
| #7  | radio next communication:ti,ab,kw (Word variations have been searched) | 3    |
| #8  | MeSH descriptor: [(Maternal Health Services)] explode all trees        | 1651 |
| #9  | MeSH descriptor: [(Emergency Medical Services)] explode all trees      | 3049 |
| #10 | medical next help:ti,ab,kw (Word variations have been searched)        | 33   |
| #11 | #1 or #2 or #3 or #4                                                   | 6125 |
| #12 | #5 or #6 or #7                                                         | 506  |
| #13 | #8 or #9 or #10                                                        | 4723 |
| #14 | #11 and #12 and #13                                                    | 7    |

## 2. Pubmed

Date Run: 15/06/15

Search strategy: ((((((pregnant women[(MeSH Terms)]) OR childbirth[(MeSH Terms)]) OR pregnant women) OR childbirth)) AND (((((((cell phones[(MeSH Terms)]) OR mobile phones[(MeSH Terms)]) OR mobile health[(MeSH Terms)]) OR cell phones) OR mobile phones) OR mobile health) OR mhealth) OR radio communication)) AND (((((maternal health services[(MeSH Terms)]) OR emergency medical services[(MeSH Terms)]) OR maternal health services) OR emergency medical services) OR medical help)

Search hits = 86

## 3. Maternity and Infant Care (Ovid)

Date Run: 15/06/15

Search strategy: (((((pregnant wom\* or childbirth) and cell phone\*) or mobile phone\* or radio communication) and maternal health service\*) or emergency medical service\* or medical help).af.

Number of hits = 339

## 4. Web of Science (ISI)

Date Run: 15/06/15

Search strategy: TOPIC: (pregnant wom\* OR childbirth) AND TOPIC: (cell\* phone\* OR mobile phone\* OR radio communication) AND TOPIC: (maternal health service\* OR emergency medical service\* OR medical help)

Timespan: All years.

Search language=English

Number of hits = 35

## 5. Google Scholar

Date Run: 15/06/15

Search strategy: ("pregnant wom\*" OR childbirth) AND ("cell\* phone\*" OR "mobile phone\*") AND ("maternal health service\*" OR "emergency medical service\*" OR "medical help")

Number of hits = 209
